# Supplementary material for: Aberrant cell segregation in the craniofacial primordium and the emergence of facial dysmorphology in craniofrontonasal syndrome
Source: PLoS Genet. 2020 Feb 24;16(2):e1008300. doi: 10.1371/journal.pgen.1008300 (PMC7058351; doi:10.1371/journal.pgen.1008300)
Supplement: S1 Table — (XLSX) [file pgen.1008300.s011.xlsx]

## Sheet: Morphometrics
For morphometric experiments relating to Fig. 1, Fig S1, S2
Cross
Sire	Dam
b-actin-CreTg/o	Efnb1lox/lox or C57BL/6J	Stage
Embryo Genotype		E11.5	E12.5	E13.5	E14.5
Control	Efnb1lox/Y or Efnb1lox/+ or +/+	28	23	29	45
Experimental (male)	b-actin-CreTg/o; Efnb1Δ/Y	21	19	17	25
Experimental (female)	b-actin-CreTg/o; Efnb1+/Δ	26	17	13	29
For morphometric experiments relating to Fig. 6
Cross
Sire	Dam
Sox10-CreTg/o	Efnb1lox/lox	Stage
Embryo Genotype		E14.5
Control (male)	Efnb1lox/Y	10
Control (female)	Efnb1lox/+	10
Experimental (male)	Sox10-CreTg/o; Efnb1Δ/Y	10
Experimental (female)	Sox10-CreTg/o; Efnb1+/Δ	11
For morphometric experiments relating to Fig. 6
Cross
Sire	Dam
Sox1Cre/+	Efnb1lox/lox	Stage
Embryo Genotype		E14.5
Control (female)	Efnb1lox/+	13
Experimental (female)	Sox1Cre/+; Efnb1+/Δ	11
For morphometric experiments relating to Fig. 7
EphB series	Stage
Embryo Genotype	E14.5
+/+	7
EphB1+/-	4
EphB1-/-	3
EphB2+/-	4
EphB2-/-	5
EphB3+/-	4
EphB3-/-	4
EphB1+/-; EphB2+/-	4
EphB1+/-; EphB2-/-	5
EphB1-/-; EphB2+/-	7
EphB1-/-; EphB2-/-	9
EphB1+/-; EphB3+/-	5
EphB1+/-; EphB3-/-	3
EphB1-/-; EphB3+/-	4
EphB1-/-; EphB3-/-	4
EphB2+/-; EphB3+/-	6
EphB2+/-; EphB3-/-	2
EphB2-/-; EphB3+/-	5
EphB2-/-; EphB3-/-	3
EphB1+/-; EphB2+/-; EphB3+/-	4
EphB1+/-; EphB2-/-; EphB3+/-	5
EphB1+/-; EphB2+/-; EphB3-/-	3
EphB1+/-; EphB2-/-; EphB3-/-	5
EphB1-/-; EphB2+/-; EphB3+/-	4
EphB1-/-; EphB2-/-; EphB3+/-	6
EphB1-/-; EphB2+/-; EphB3-/-	4
EphB1-/-; EphB2-/-; EphB3-/-	3

## Sheet: Efnb1_IF
For cell segregation experiments relating to Fig. 2-4; Fig. S3
Cross
Sire	Dam
Sox10-CreTg/o; XGFP/Y	Efnb1lox/lox	Stage
Embryo Genotype		E10.5	E11.5	E13.5
Control	Efnb1+XGFP/lox	4	4	4
Experimental	Sox10-CreTg/o; Efnb1+XGFP/Δ	6	4	5
For cell segregation experiments relating to Fig. 5; Fig. S5
Cross
Sire	Dam
Sox1Cre/+; XGFP/Y	Efnb1lox/lox	Stage
Embryo Genotype		E13.5
Control	Efnb1+XGFP/lox	--
Experimental	Sox1Cre/+; Efnb1+XGFP/Δ	4
For lineage tracing and cell segregation experiments relating to Fig. S5
Cross
Sire	Dam
ROSA26mTmG/mTmG	Sox1Cre/+	Stage
Embryo Genotype		E13.5
Experimental	Sox1Cre/+; ROSA26mTmG/+	6
For cell segregation experiments relating to Fig. 3, 4; Fig. S4
Cross
Sire	Dam
Shox2IresCre/+; XGFP/Y	Efnb1lox/lox	Stage
Embryo Genotype		E11.5	E12.5	E13.5
Control	Efnb1+XGFP/lox	3	3	3
Experimental	Shox2IresCre/+; Efnb1+XGFP/Δ	3	4	4
For lineage tracing experiments related to Fig. S4
Cross
Sire	Dam
ROSA26mTmG/mTmG	Shox2IresCre/+	Stage
Embryo Genotype		E11.5	E12.5	E13.5
Experimental	Shox2IresCre/+; ROSA26mTmG/+	2	2	2
For EPHRIN-B1 IF experiments relating to Fig. 3-5, S3
Cross
Sire	Dam
b-actin-CreTg/o; XGFP/Y	Efnb1lox/lox	Stage
Embryo Genotype		E10.5	E13.5
Control	Efnb1+XGFP/lox	2	2
Experimental	b-actin-CreTg/o; Efnb1+XGFP/Δ	3	5
For experiments relating to Fig. 8, Fig. S8, S9
Cross
Sire	Dam
Efnb1lox/y; EphB1-/-; EphB2-/-; EphB3+/- or	EphB1+/-; EphB2+/-; EphB3+/-; Actin-Cretg/0 or
Efnb1lox/y; EphB1-/-; EphB+/-; EphB-/- or	EphB1-/-; EphB2+/-; EphB3-/-; Actin-Cretg/0 or
	EphB1+/-; EphB2-/-; EphB3+/-; Actin-Cretg/0 or
	EphB1-/-; EphB2+/-; EphB3+/-; Actin-Cretg/0 or
		Stage
Embryo Genotype		E13.5
Control	Efnb1lox/+ or Efnb1lox/lox	3
Experimental	Efnb1+/Δ; EphB1+/-; EphB2+/-; EphB3+/-; Actin-Cretg/0	3
	Efnb1+/Δ; EphB1-/-; EphB2+/-; EphB3+/-; Actin-Cretg/0	3
	Efnb1+/Δ; EphB1+/-; EphB2-/-; EphB3+/-; Actin-Cretg/0	3
	Efnb1+/Δ; EphB1+/-; EphB2+/-; EphB3-/-; Actin-Cretg/0	4
	Efnb1+/Δ; EphB1-/-; EphB2-/-; EphB3+/-; Actin-Cretg/0	3
	Efnb1+/Δ; EphB1-/-; EphB2+/-; EphB3-/-; Actin-Cretg/0	4
	Efnb1+/Δ; EphB1+/-; EphB2-/-; EphB3-/-; Actin-Cretg/0	3
	Efnb1+/Δ; EphB1-/-; EphB2-/-; EphB3-/-; Actin-Cretg/0	3
For experiments relating to Fig. S7
Cross
Sire	Dam
EphB1-/-; EphB2-/-; EphB3+/-; Actin-Cretg/0	EphB1+/-; EphB2+/-; EphB3-/-; Actin-Cretg/0
		Stage
Embryo Genotype		E13.5
Experimental	EphB1-/-; EphB2-/-; EphB3-/-	3
Cross
Sire	Dam
C57Bl/6J	C57Bl/6J
		Stage
Embryo Genotype		E13.5
Control	Wild-type (C57Bl/6J)	2

## Sheet: Ephb1 EPHB2 EPHB2_expression
Cross
Sire	Dam
C57Bl/6J	C57Bl/6J
		Stage
Embryo Genotype		E13.5
Experimental	Wild-type (C57Bl/6J)	2
For experiments relating to Fig. S6

## Sheet: Cleaved caspase 3 IF
Cross
Sire	Dam
b-actin-CreTg/o	Efnb1lox/lox	Stage
Embryo Genotype		E13.5
Control	Efnb1lox/+	3
Experimental	b-actin-CreTg/o; Efnb1Δ/+	3
	b-actin-CreTg/o; Efnb1Δ/Y	3
For experiments relating to Fig. S10
